# Supplementary material for: g-C3N4/Bi2MoO6 heterojunctions for enhanced visible light photocatalytic oxidation of biomass-derived 5-hydroxymethylfurfural to 2,5-diformylfuran under ambient conditions
Source: Royal Society of Chemistry journal article supplement (doi:10.1039/d5gc06553d), 2026-01-01
Supplement: d5gc06553d1.pdf [file d5gc06553d1.pdf]

**g-C<sub>3</sub>N<sub>4</sub>/Bi<sub>2</sub>MoO<sub>6</sub> heterojunctions for enhanced visible light  
photocatalytic oxidation of biomass-derived 5-  
hydroxymethylfurfural to 2,5-diformylfuran under ambient  
conditions**

Lin-Yu Jiao<sup>a,\*</sup>, Ze-Long Sun<sup>a</sup>, Wen-Yu Luo<sup>a</sup>, Ying-Ying Xu<sup>a</sup>, Fei Wen<sup>a</sup>, Yanfei Xu<sup>b</sup>,  
Zhuo Li<sup>a</sup>, Wei Zhao<sup>a</sup>, Shanshan Liu<sup>c,\*</sup>, Mingyue Ding<sup>b,\*</sup>

<sup>a</sup> School of Chemical Engineering, Northwest University, Xi'an, Shaanxi, 710127, P. R. China

<sup>b</sup> School of Power and Mechanical Engineering, Wuhan University, Wuhan, Hubei, 430072, P. R. China

<sup>c</sup> Shaanxi Key Laboratory of Chemical Additives for Industry, College of Chemistry and Chemical Engineering, Shaanxi University of Science and Technology, Xi'an, Shaanxi, 710021 P. R. China

E-mail address:

lyjiao@nwu.edu.cn (L.-Y. Jiao),

liushanshan@sust.edu.cn (S. Liu),

dingmy@whu.edu.cn (M. Ding)

## Supporting Information

### Table of Contents

|   |                                                  |     |
|---|--------------------------------------------------|-----|
| 1 | Experimental and Characterization Results        | S2  |
| 2 | Comparison of Reaction Results in Recent Studies | S22 |
| 3 | References                                       | S24 |

## I. Experimental and Characterization Results

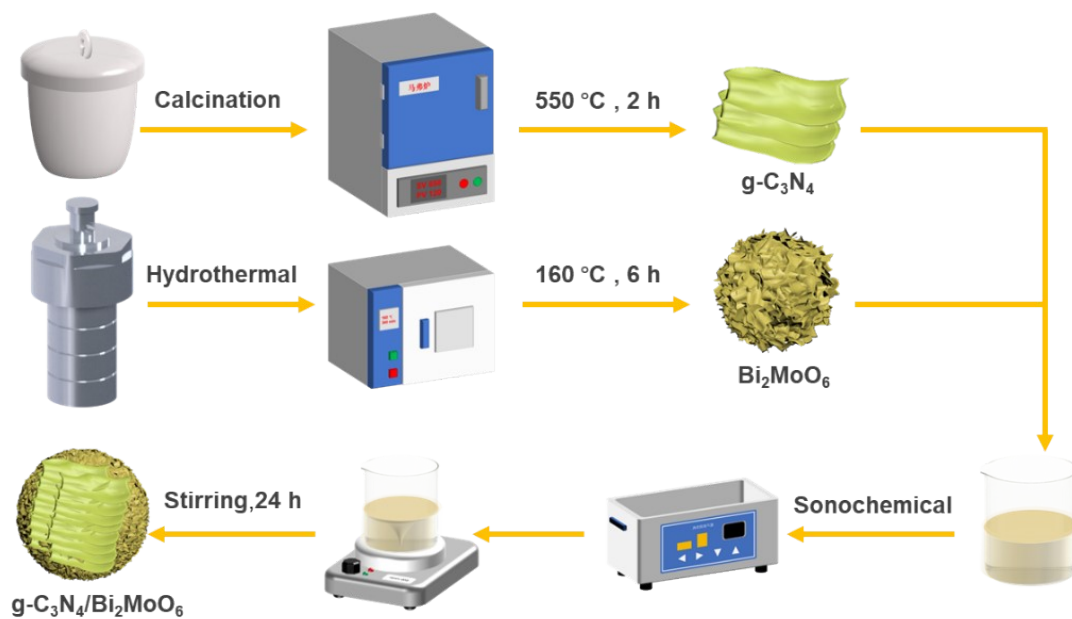

**Scheme S1.** Illustration of the preparation of CN/BMO composite.

Under aerobic photocatalytic conditions, 5-hydroxymethylfurfural (HMF) underwent selective oxidation to yield 2,5-diformylfuran (DFF) as the product. Reaction mixtures were analyzed using high-performance liquid chromatography (HPLC; Shimadzu LC-20AD system equipped with a C18AQ column, 250 × 4.6 mm, 5 μm). As demonstrated in Figure S1, the chromatographic analysis revealed exclusive detection of HMF and DFF, with no observable byproducts, confirming the high selectivity of the transformation.

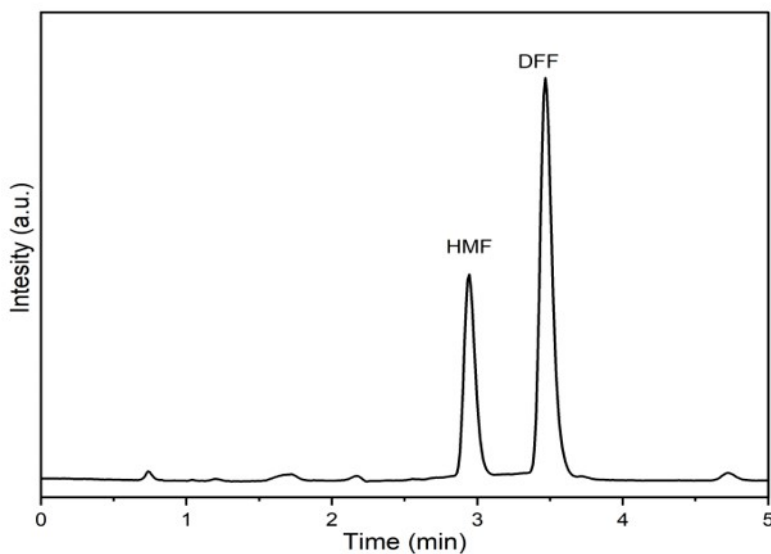

**Figure S1.** HPLC analysis of HMF and DFF.

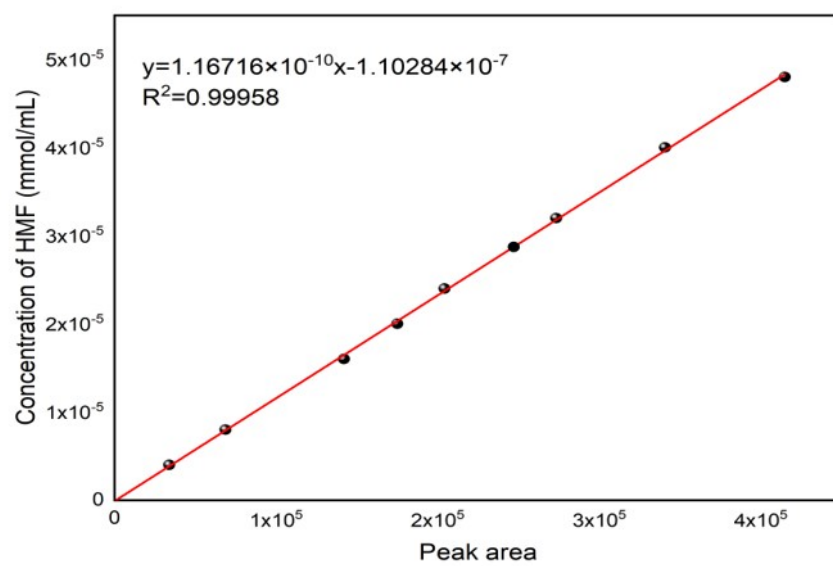

**Figure S2.** Standard curve of HMF.

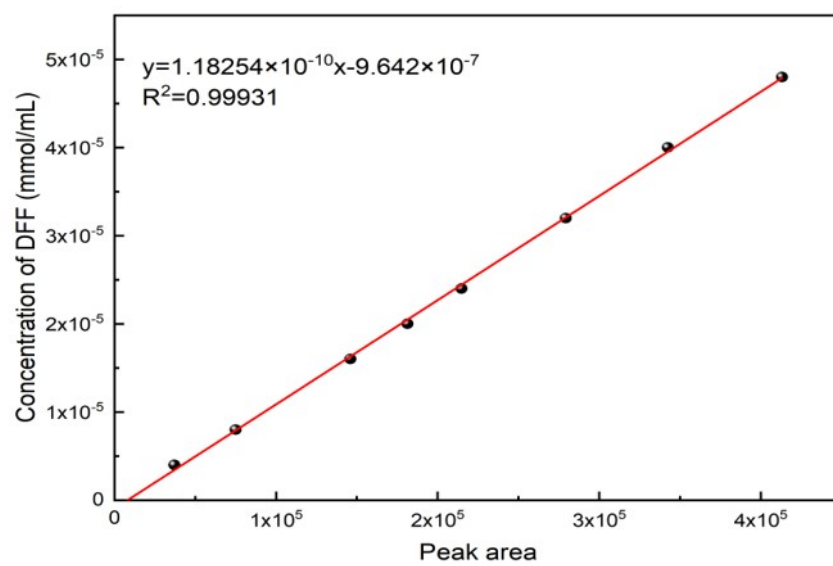

**Figure S3.** Standard curve of DFF.

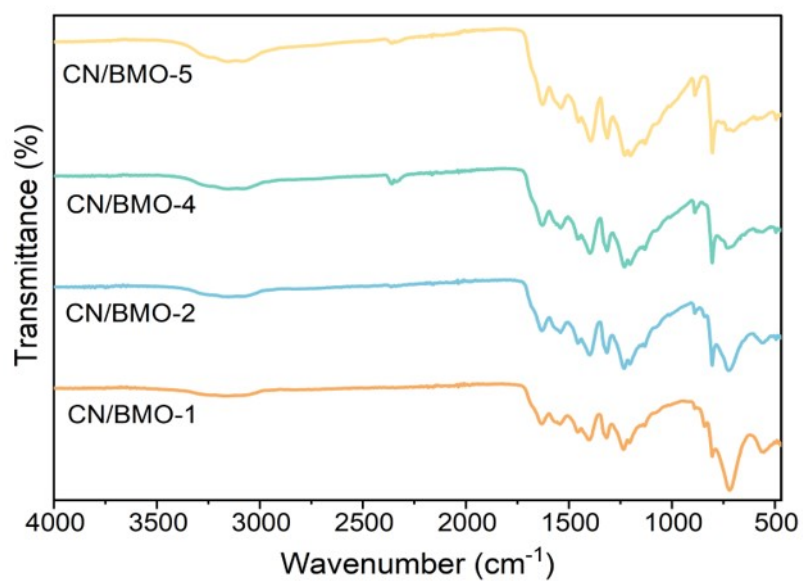

**Figure S4.** FT-IR spectra of CN/BMO-1, CN/BMO-2, CN/BMO-4, and CN/BMO-5.

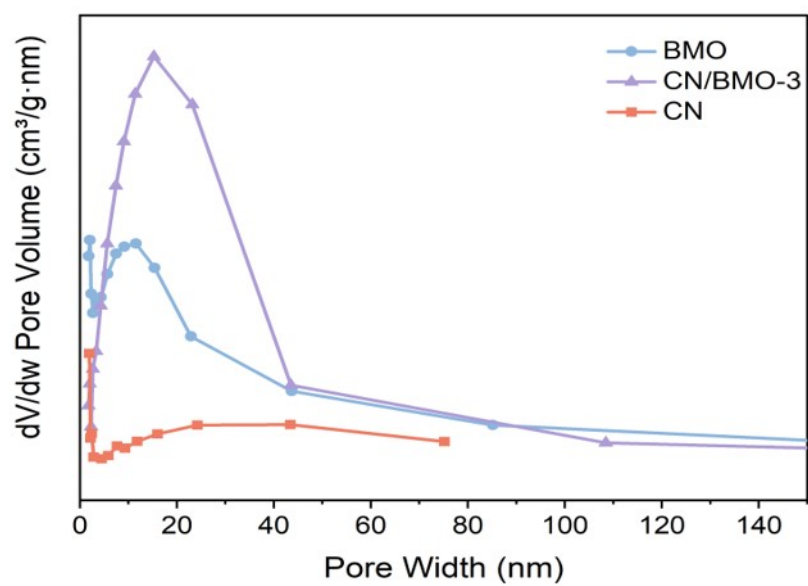

**Figure S5.** Pore size distribution plots of CN, BMO, and CN/BMO-3.

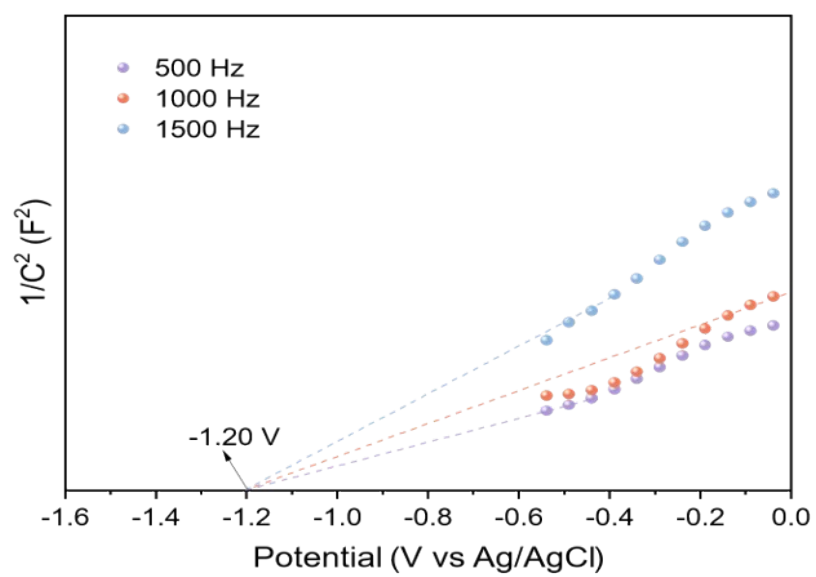

**Figure S6.** Mott-Schottky curves of CN

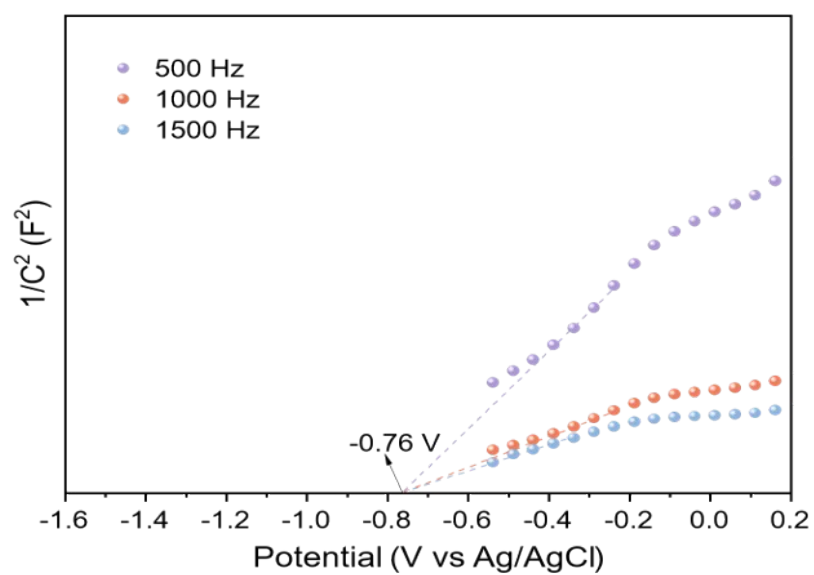

**Figure S7.** Mott-Schottky curves of BMO.

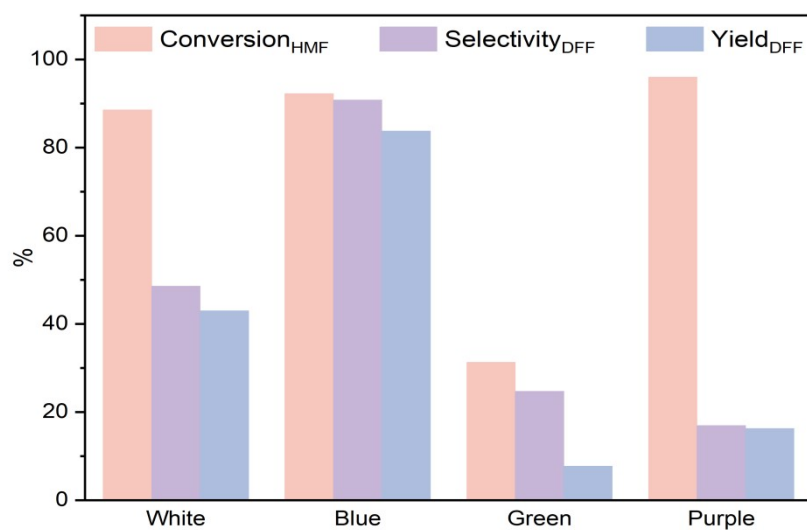

**Figure S8.** Influence of different wavelengths on photocatalytic oxidation of HMF.

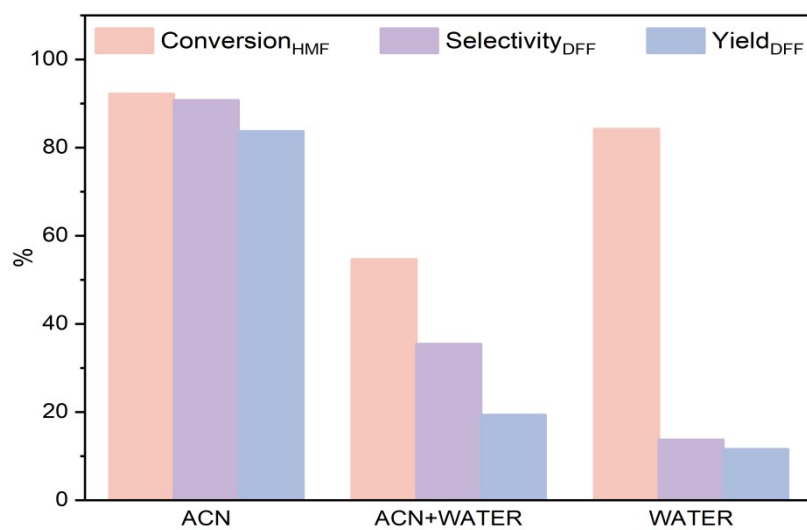

**Figure S9.** Influence of different solvents on photocatalytic oxidation of HMF.

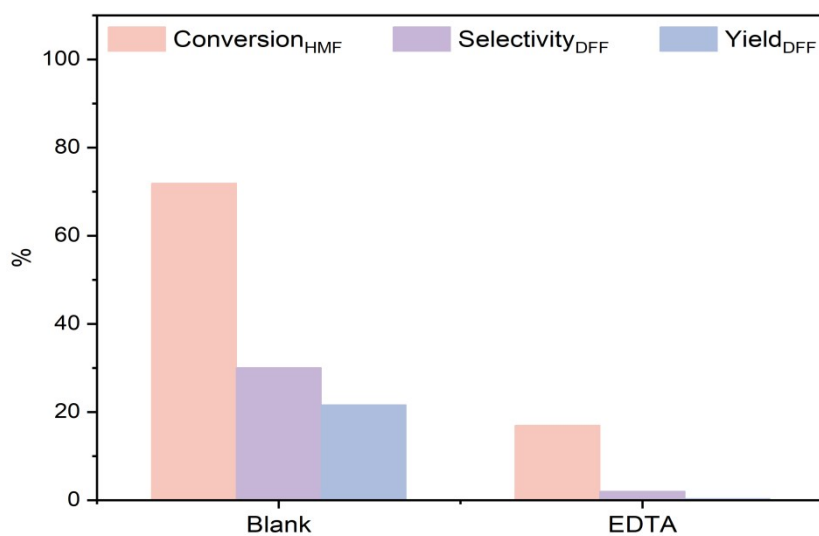

**Figure S10.** Active species trapping experiments under anaerobic conditions.

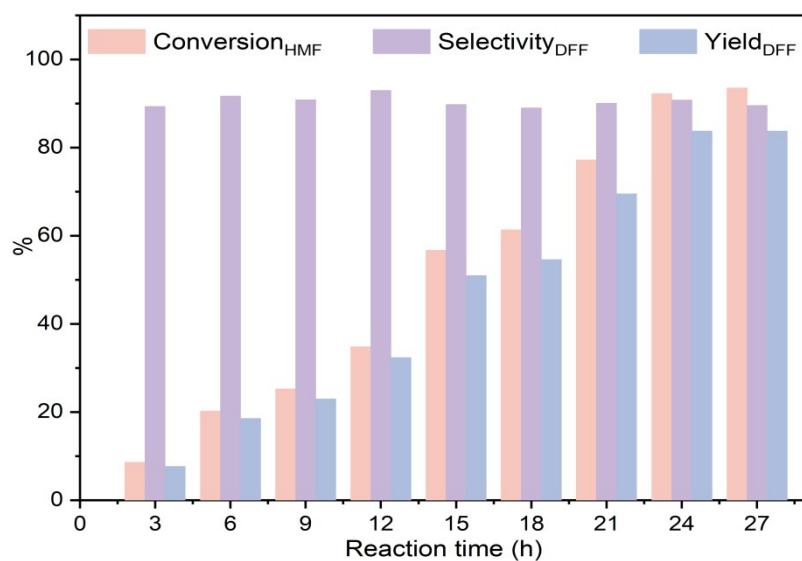

**Figure S11.** Influence of the reaction time on photocatalytic oxidation of HMF.

The hydrogen peroxide ( $\text{H}_2\text{O}_2$ ) production was determined through a standardized iodometric colorimetric method. To 1 mL of the reaction mixture, we sequentially added: 1 mL aqueous KI solution (0.4 M) as the iodide source and 1 mL potassium hydrogen phthalate buffer (0.1 M, pH = 4.0) to maintain optimal acidic conditions. The mixed solution was kept in complete darkness for 2 h to ensure complete reaction while preventing photochemical interference. During this period,  $\text{H}_2\text{O}_2$  quantitatively oxidizes iodide to form the triiodide anion ( $\text{I}_3^-$ ) according to the following stoichiometric equation:

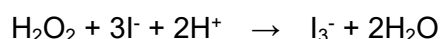

The resulting  $\text{I}_3^-$  complex exhibits a characteristic absorption band at 350 nm, final validation of  $\text{H}_2\text{O}_2$  generation was performed using diffuse reflectance UV-Vis spectroscopy (DRS).

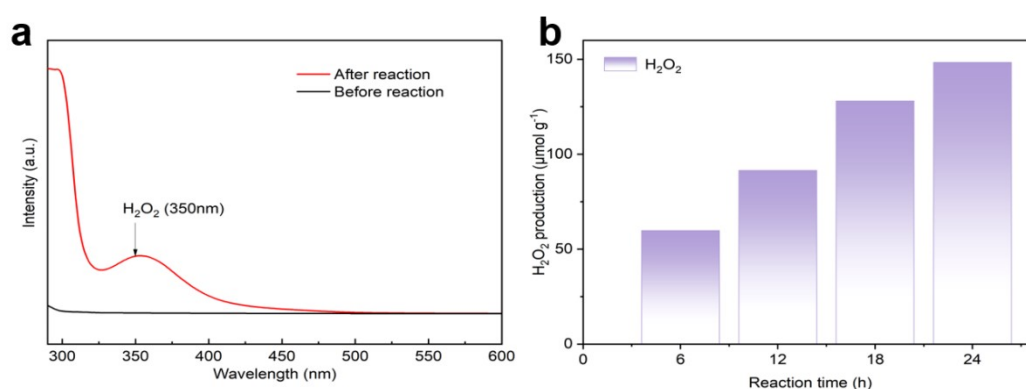

**Figure S12.** (a) UV–Vis spectra of  $\text{H}_2\text{O}_2$  production. (b) The  $\text{H}_2\text{O}_2$  production at different times.

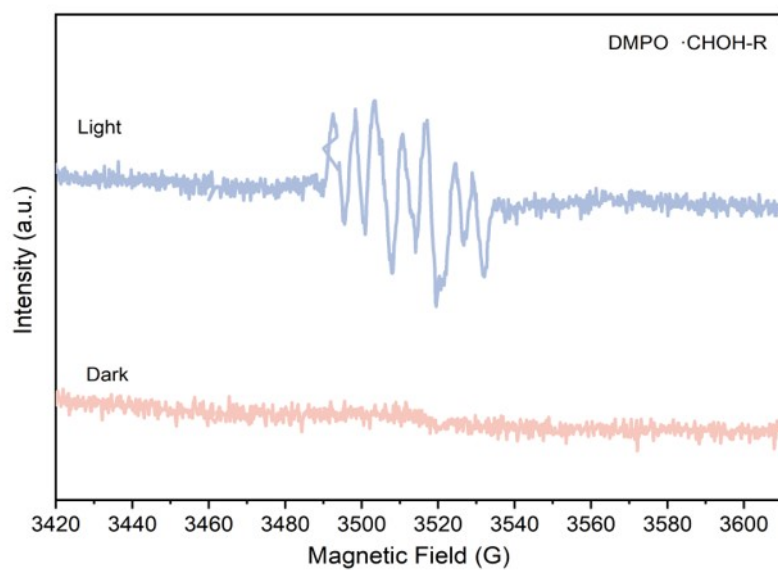

**Figure S13.** In EPR spectra of CN/BMO-3 were recorded in HMF-containing solution using DMPO as the spin-trapping agent, comparing dark conditions with visible light irradiation.

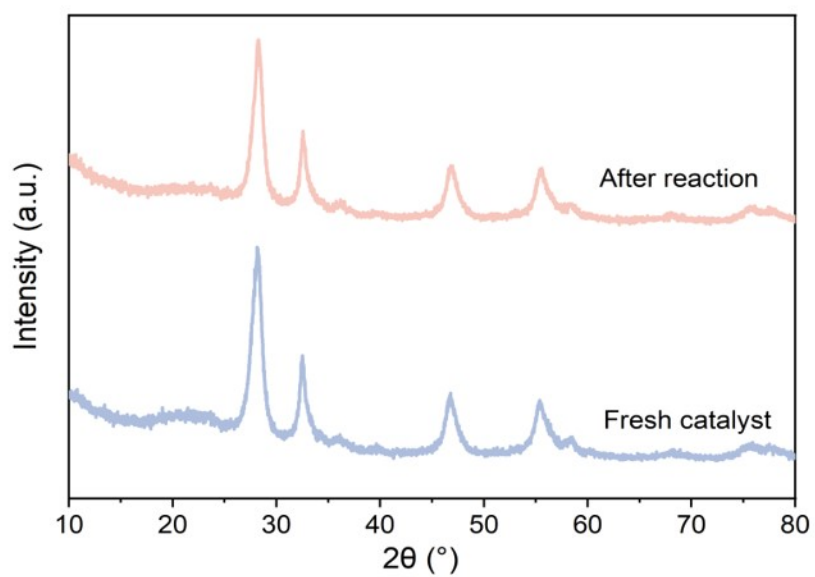

**Figure S14.** XRD diffraction patterns of CN/BMO-3 before and after the cyclic reaction.

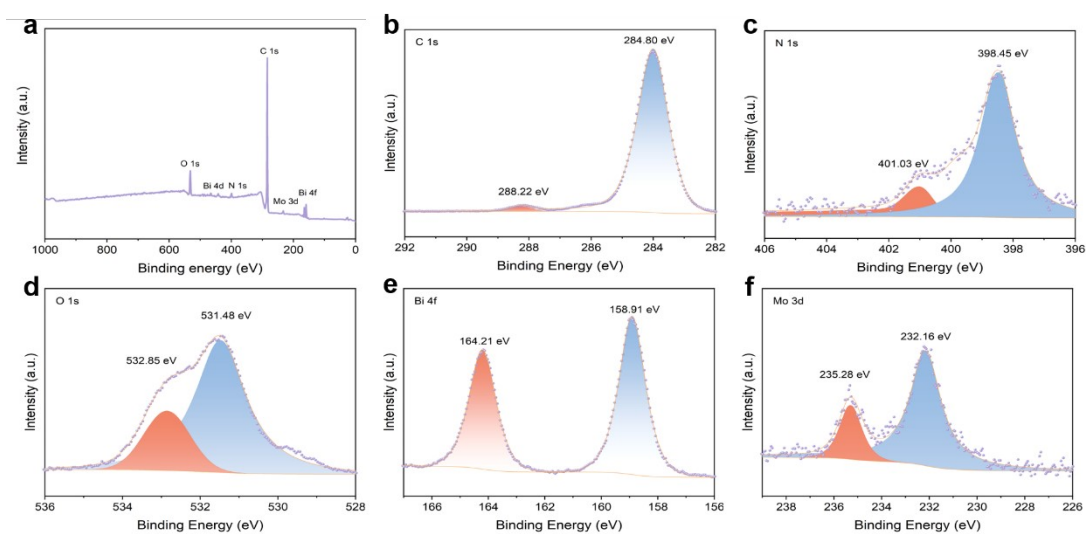

**Figure S15.** The high resolution XPS spectra of (a) survey spectra, (b) C 1s, (c) N 1s, (d) O 1s, (e) Bi 4f and (f) Mo 3d of CN/BMO-3 after the cyclic reaction.

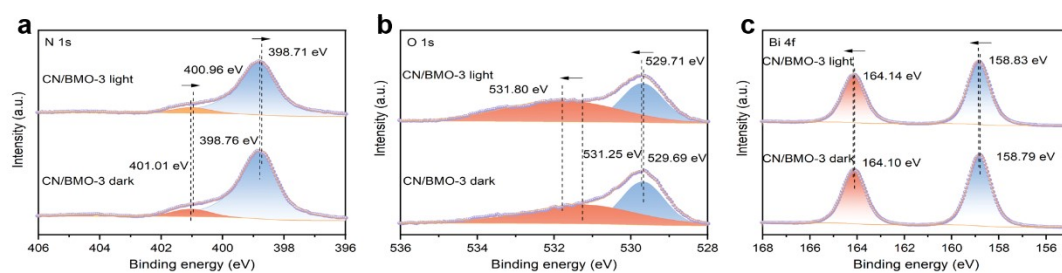

**Figure S16.** The high resolution XPS spectra of (a) N 1s, (b) O 1s, and (c) Bi 4f of CN/BMO-3 in the dark and light, respectively.

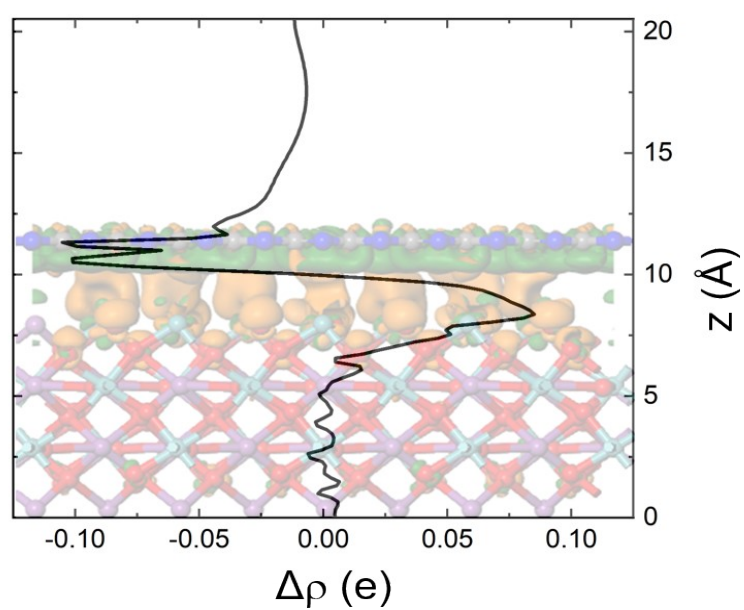

**Figure S17.** Charge density difference of CN/BMO (**Orange**: electronic accumulation; **Green**: electronic depletion).

**Table S1.** Conversion of HMF to DFF using CN/BMO-3 catalyst under varied conditions.

| Entry          | Catalyst | Light       | Atmosphere     | Conv. (%) | Select. (%) | Yield. (%) |
|----------------|----------|-------------|----------------|-----------|-------------|------------|
| 1              | CN/BMO-3 | No          | Air            | trace     | -           | -          |
| 2              | No       | 10 W 455 nm | Air            | 24.1      | -           | -          |
| 3              | CN/BMO-3 | 10 W 455 nm | N <sub>2</sub> | 71.9      | 30.0        | 21.6       |
| 4              | CN/BMO-3 | 10 W 455 nm | Air            | 92.2      | 90.8        | 83.7       |
| 5 <sup>a</sup> | CN-BMO   | 10 W 455 nm | Air            | 67.3      | 78.2        | 52.7       |

<sup>a</sup> Physical mixing of CN and BMO. Reaction conditions: 10 mM of HMF, 40 mg of catalyst, 25 °C, 24 h.

**Table S2.** Specific surface area, pore volume, and pore size of CN, BMO, and CN/BMO-3.

| Catalyst | Specific surface area<br>(m <sup>2</sup> /g) | Pore volume<br>(cm <sup>3</sup> /g) | Pore diameter<br>(nm) |
|----------|----------------------------------------------|-------------------------------------|-----------------------|
| CN       | 7.45                                         | 0.06                                | 22.43                 |
| BMO      | 32.33                                        | 0.16                                | 16.59                 |
| CN/BMO-3 | 44.11                                        | 0.22                                | 16.87                 |

## II. Comparison of Reaction Results in Recent Studies

**Table S3.** Comparative of photocatalytic HMF-to-DFF conversion in recent studies.

| Catalyst                                                          | Reaction conditions                                    | HMF (mM) | Solvent | Conv. (%) | Select. (%) | Yield. (%) | Refs      |
|-------------------------------------------------------------------|--------------------------------------------------------|----------|---------|-----------|-------------|------------|-----------|
| <b>g-C<sub>3</sub>N<sub>4</sub>/Bi<sub>2</sub>MoO<sub>6</sub></b> | 10 W blue LED ( $\lambda$ = 455 nm), Air, 25 °C        | 10       | ACN     | 92.2      | 90.8        | 83.7       | This work |
| <b>UCNT</b>                                                       | 300 W Xe lamp, Vacuum, 15 °C                           | 10       | Water   | 48.0      | 95.0        | 45.6       | 1         |
| <b>MCN</b>                                                        | Fluorescent lamp (340–420 nm), O <sub>2</sub> , 25 °C  | 0.5      | Water   | 50.0      | 35.0        | 17.5       | 2         |
| <b>Fe(III)/ Bi<sub>2</sub>MoO<sub>6</sub></b>                     | 500 W Xe lamp, O <sub>2</sub>                          | 20       | Water   | 32.6      | 95.3        | 31.0       | 3         |
| <b>Bi<sub>2</sub>MoO<sub>6</sub></b>                              | 300 W Xe lamp, O <sub>2</sub> , 25 °C                  | 30       | ACN     | 19.0      | 99.0        | 18.8       | 4         |
| <b>NiS<sub>2</sub>/CdS</b>                                        | 300 W Xe lamp, N <sub>2</sub>                          | 10       | Water   | 54.5      | 95.2        | 51.9       | 5         |
| <b>Ni/CdS</b>                                                     | 8 W blue LED ( $\lambda$ = 440–460 nm), N <sub>2</sub> | 5        | Water   | 24.6      | 100         | 24.6       | 6         |
| <b>CN-WO<sub>3</sub>@MnO<sub>2</sub></b>                          | 10 W blue LED ( $\lambda$ = 420 nm), O <sub>2</sub>    | 0.5      | ACN     | 77.6      | 79.6        | 61.8       | 7         |
| <b>S-vacancy ZnIn<sub>2</sub>S<sub>4</sub></b>                    | 20 W blue LED ( $\lambda$ = 445 ± 10 nm), Air          | 5        | ACN     | 96.5      | 79.9        | 77.1       | 8         |

- (1) Our photocatalytic system employs a low-wattage LED lamp (10 W) instead of conventional high-power xenon lamps (typically 300–500 W), demonstrating significant energy efficiency advantages while maintaining high catalytic performance.
- (2) In contrast to aerobic oxidation systems requiring continuous O<sub>2</sub> flow, our catalyst achieves complete conversion using only ambient air, representing a greener approach.
- (3) While most high-selectivity catalysts utilized sulfides (which suffer from photo-corrosion-induced deactivation), our system employs carbon nitride and bismuth molybdate - non-toxic materials with facile preparation.
- (4) The ultrasonication-assisted exfoliation during preparation increases the catalyst's specific surface area and pore volume, thereby providing abundant active sites.
- (5) The constructed heterojunction significantly enhances the separation efficiency of photogenerated electron-hole pairs and prolongs charge carrier lifetime, consequently improving photocatalytic activity.

### III. References

1. X. Bao, M. Liu, Z. Wang, D. Dai, P. Wang, H. Cheng, Y. Liu, Z. Zheng, Y. Dai and B. Huang, *ACS Catal.*, 2022, **12**, 1919-1929.
2. I. Krivtsov, E. I. García-López, G. Marci, L. Palmisano, Z. Amghouz, J. R. García, S. Ordóñez and E. Díaz, *Appl. Catal., B*, 2017, **204**, 430-439.
3. J. Xue, C. Huang, Y. Zong, J. Gu, M. Wang and S. Ma, *Appl Organomet Chem*, 2019, **33**, e5187.
4. A. Kumar and R. Srivastava, *ACS Appl. Nano Mater.*, 2021, **4**, 9080-9093.
5. S. Liu, B. Zhang, Z. Yang, Z. Xue and T. Mu, *Green Chem.*, 2023, **25**, 2620-2628.
6. G. Han, Y.-H. Jin, R. A. Burgess, N. E. Dickenson, X.-M. Cao and Y. Sun, *J. Am. Chem. Soc.*, 2017, **139**, 15584-15587.
7. H. Qian, Q. Hou, W. Zhang, Y. Nie, R. Lai, H. Ren, G. Yu, X. Bai, H. Wang and M. Ju, *Appl. Catal., B*, 2022, **319**, 121907.
8. Y. Liu, W. Xue, A. Chowdhury, A. Putta Rangappa and J. Zhao, *Chem. Eng. J.*, 2024, **497**, 154613.
